# Supplementary material
Source: PubMed Central journal article supplement (PMC4266354)
Supplement: CVI.00394-14_zcd999095086so1.pdf [file CVI.00394-14_zcd999095086so1.pdf]

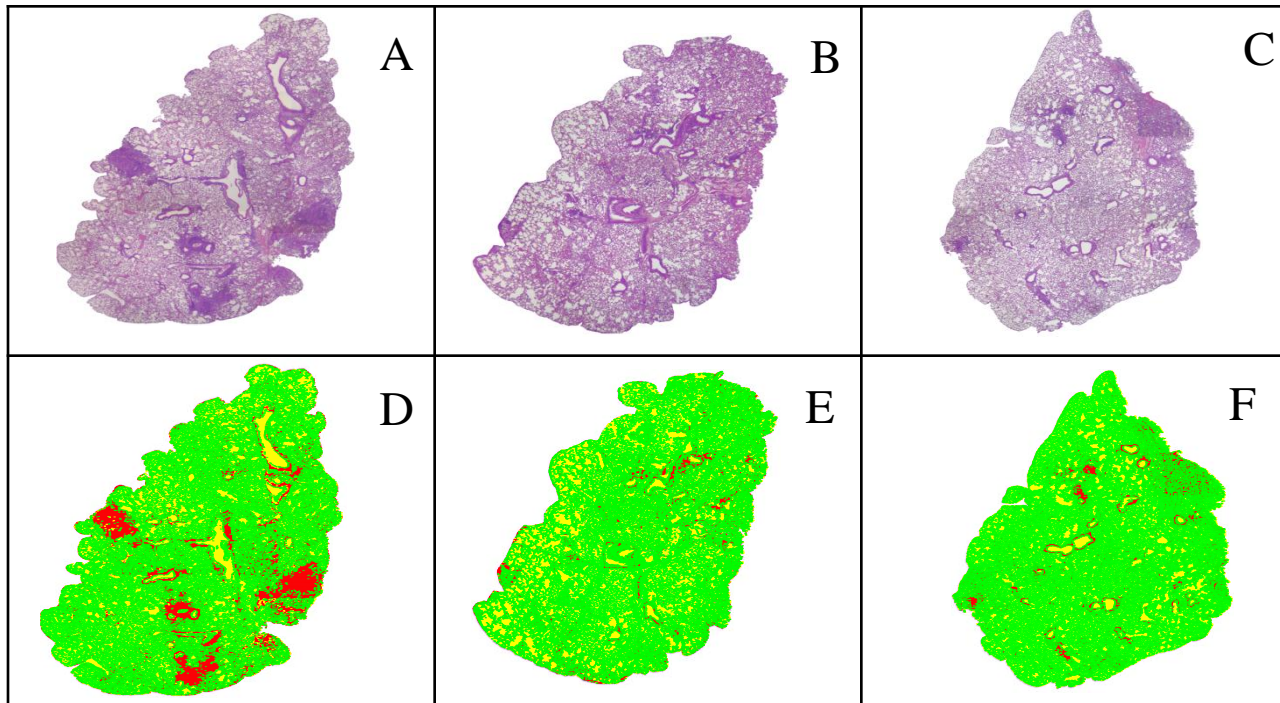

FIG S1 Representative H&E stained lung section micrographs (A – C) and computer-generated Images (D – F) from naïve (A, D), s.c. immunized (B, E) and i.n. immunized mice (C, F).
